# Supplementary material for: A comparison of five methods to maximize RNA and DNA isolation yield from adipose tissue
Source: PeerJ. 2024 May 3;12:e17071. doi: 10.7717/peerj.17071 (PMC11073010; doi:10.7717/peerj.17071)
Supplement: Supplemental Information 1 [file peerj-12-17071-s001.xlsx]

## Sheet: Arkusz1
	Method I						Method II						Method III						Method IV						Method V
Sample	Tissue weight [mg]	A260/280	A260/230	RNA conc. [ng/ul]	RNA yield [ng/mg]	RIN	Tissue weight [mg]	A260/280	A260/230	RNA conc. [ng/ul]	RNA yield [ng/mg]	RIN	Tissue weight [mg]	A260/280	A260/230	RNA conc. [ng/ul]	RNA yield [ng/mg]	RIN	Tissue weight [mg]	A260/280	A260/230	RNA conc. [ng/ul]	RNA yield [ng/mg]	RIN	Tissue weight [mg]	A260/280	A260/230	RNA conc. [ng/ul]	RNA yield [ng/mg]	RIN
1.1.	24.34	1.81	0.1326	229.2	282.498	5.1	25.06	1.89	1.15	274.9	329.09	6.1	24.64	1.47	1.2	0.8	1.62338	NS	24.83	2.03	0.4	75.2	151.409	6.7	24.71	1.87	2.14	27.3	220.963	6.2
1.2.	24.17	1.79	0.1814	195	242.036	4.8	24.18	1.87	1.45	286.6	355.583	6.2	25.49	1.64	0.1	0.7	1.37309	NS	24.83	2.05	1.7	8.2	16.5101	5.8	25.23	1.89	2.58	25	198.177	6.7
1.3.	24.5	1.85	0.1258	238.4	291.918	NS	24.99	1.88	0.5	221.4	265.786	6.2	25.37	1.61	0.3	0.6	1.1825	NS	24.83	2.04	1.3	32.1	64.6309	6.4	25.42	1.84	4.09	24.2	190.401	6.3
2.1.	25.38	1.81	0.2356	317.8	375.65	5.6	25.27	1.77	0.08	103.6	123.008	5.7	24.41	1.95	2.4	57.3	117.37	8.6	25.08	2.03	0.9	52.1	103.84	7.1	25.26	1.92	2.06	46.4	367.379	4.6
2.2.	25.26	1.88	0.1952	424.3	503.919	5.6	25.27	1.77	0.21	126.9	150.673	5.6	25.78	1.9	0.1	5.8	11.249	NS	25.08	2.03	0.5	45	89.6891	7.1	24.82	1.87	1.9	29.7	239.323	5.4
2.3.	24.49	1.84	0.414	212.6	260.433	4.5	25.27	1.75	0.4	149.3	177.269	5.5	25.22	1.9	0	0.5	0.991277	NS	25.08	2.03	2.5	67.3	134.135	6.9	25.17	1.86	1.83	28.5	226.46	5.6
3.1.	24.67	1.78	0.03167	80.6	98.0138	5.1	24.92	1.81	0.59	213.8	257.349	6.2	25.69	2	0.3	50.6	98.4819	8.2	25.12	2.03	2	60.2	119.841	7	25.48	1.81	2.06	26.5	208.006	7.3
3.2.	24.96	1.79	0.04263	176.4	212.019	5.6	24.92	1.79	0.13	118.2	142.276	5.9	24.26	1.95	2.7	33.6	69.2498	9	25.12	2.02	2	46.5	92.568	6.8	24.74	1.83	2.01	23.2	187.551	5.7
3.3.	24.48	1.78	0.04948	137.1	168.015	5.2	24.92	1.73	0.33	159.5	191.989	5.4	25.76	1.96	2.8	46.3	89.868	7.2	25.12	2.02	3	32.6	64.8971	6.5	24.59	1.81	3.23	26	211.468	5.1
4.1.	24.83	1.83	0.317	303.3	366.452	5.7	25.33	1.81	0.39	214	253.454	6.3	25.64	1.84	0	1.9	3.70515	NS	25.29	2.04	0.9	62	122.578	7	24.88	1.87	1.87	39.3	315.916	5.4
4.2.	25.68	1.84	0.07585	140.3	163.902	5	25.33	1.81	0.43	116.2	137.623	6.7	25.03	1.69	0.3	1.5	2.9964	NS	25.29	2.02	2.3	48.3	95.4923	6.9	24.71	1.89	1.94	46.1	373.128	5.3
4.3.	24.44	1.83	0.1641	214.4	263.175	5	25.33	1.84	0.36	232.6	275.484	6.6	24.45	1.84	0	0.8	1.63599	NS	25.29	2.02	2.1	78.6	155.397	7.2	25.65	1.89	1.72	38.2	297.856	5.4
5.1.	25.1	1.82	0.03014	177.7	212.39	4.7	25.73	1.84	0.18	176.4	209.391	5.9	25.32	1.78	0	1.6	3.15956	NS	25.32	2.02	1.4	48.7	96.1564	7	25.43	1.77	1.68	17.6	138.419	5.3
5.2.	24.93	1.81	0.0435	233.6	281.107	4.3	25.73	1.86	0.41	280.1	332.485	5.9	24.88	1.64	0.1	1	2.00965	NS	25.32	2.03	1	62	122.417	6.6	24.74	1.81	2.04	22.3	180.275	5.4
5.3.	25.69	1.79	0.05103	381.9	445.971	5.2	25.73	1.88	0.73	328.9	390.412	5.6	24.94	1.66	0.1	0.8	1.60385	NS	25.32	2.03	1.3	69.8	137.818	7	25.23	1.82	5.46	19.8	156.956	4.6
6.1.	25.67	1.86	0.2817	855.3	999.571	5	25.31	1.82	0.31	134.1	158.949	5.9	24.36	1.25	0	1.2	2.46305	NS	25.03	2.02	2.1	71.7	143.228	7.3	24.45	1.86	1.5	40	327.198	5.7
6.2.	24.34	1.88	0.07666	930.3	1146.63	5.2	25.31	1.86	0.87	142.5	168.906	5.8	24.71	1.71	0.1	0.8	1.61878	NS	25.03	2.01	1.8	30.9	61.7259	NS	25.35	1.91	2.08	33.2	261.933	4.3
6.3.	25.59	1.86	0.1885	697.4	817.585	5.6	25.31	1.77	0.47	79.4	94.113	6.2	25.19	1.49	0.1	0.7	1.38944	NS	25.03	2.04	2.2	42.6	85.0979	7.6	25.12	1.88	1.85	28.2	224.522	6.3
