# Supplementary material for: A comparison of five methods to maximize RNA and DNA isolation yield from adipose tissue
Source: PeerJ. 2024 May 3;12:e17071. doi: 10.7717/peerj.17071 (PMC11073010; doi:10.7717/peerj.17071)
Supplement: Supplemental Information 3 [file peerj-12-17071-s003.xlsx]

## Sheet: Norm. and Lognorm. RNA yield (n
	MI	MII	MIII	MIV	MV
Test for normal distribution
Shapiro-Wilk test
W	0.7773	0.943	0.5934	0.9552	0.9262
P value	0.0007	0.3262	<0,0001	0.5126	0.1665
Passed normality test (alpha=0.05)?	No	Yes	No	Yes	Yes
P value summary	***	ns	****	ns	ns
Number of values	18	18	18	18	18

## Sheet: Descriptive stat. RNA yield (ng
	MI	MII	MIII	MIV	MV
Number of values	18	18	18	18	18
Minimum	98.01	94.11	0.99	16.51	138.4
25% Percentile	212.3	148.6	1.548	80.05	189.7
Median	281.8	200.7	2.235	100	222.7
75% Percentile	460.5	288.9	25.75	135.1	302.4
Maximum	1147	390.4	117.4	155.4	373.1
Range	1049	296.3	116.4	138.9	234.7
Mean	396.2	223	22.89	103.2	240.3
Std. Deviation	295	87.93	39.93	36.58	69.24
Std. Error of Mean	69.54	20.73	9.411	8.623	16.32

## Sheet: Kruskal-Wallis RNA yield (ng_mg
Number of families	1
Number of comparisons per family	10
Alpha	0.05
Dunn's multiple comparisons test	Mean rank diff,	Significant?	Summary	Adjusted P Value
MI vs. MII	13.44	No	ns	>0,9999	A-B
MI vs. MIII	58.72	Yes	****	<0,0001	A-C
MI vs. MIV	42.11	Yes	****	<0,0001	A-D
MI vs. MV	8.5	No	ns	>0,9999	A-E
MII vs. MIII	45.28	Yes	****	<0,0001	B-C
MII vs. MIV	28.67	Yes	**	0.01	B-D
MII vs. MV	-4.944	No	ns	>0,9999	B-E
MIII vs. MIV	-16.61	No	ns	0.5645	C-D
MIII vs. MV	-50.22	Yes	****	<0,0001	C-E
MIV vs. MV	-33.61	Yes	**	0.0011	D-E
Test details	Mean rank 1	Mean rank 2	Mean rank diff,	n1	n2
MI vs. MII	70.06	56.61	13.44	18	18
MI vs. MIII	70.06	11.33	58.72	18	18
MI vs. MIV	70.06	27.94	42.11	18	18
MI vs. MV	70.06	61.56	8.5	18	18
MII vs. MIII	56.61	11.33	45.28	18	18
MII vs. MIV	56.61	27.94	28.67	18	18
MII vs. MV	56.61	61.56	-4.944	18	18
MIII vs. MIV	11.33	27.94	-16.61	18	18
MIII vs. MV	11.33	61.56	-50.22	18	18
MIV vs. MV	27.94	61.56	-33.61	18	18

## Sheet: Norm. and Lognorm. RNA A260_280
	MI	MII	MIII	MIV	MV
Test for normal distribution
Shapiro-Wilk test
W	0.9396	0.9498	0.9342	0.9136	0.9578
P value	0.2856	0.422	0.2301	0.0994	0.5593
Passed normality test (alpha=0.05)?	Yes	Yes	Yes	Yes	Yes
P value summary	ns	ns	ns	ns	ns
Number of values	18	18	18	18	18

## Sheet: Descriptive stat. RNA A260_280
	MI	MII	MIII	MIV	MV
Number of values	18	18	18	18	18
Minimum	1.78	1.73	1.25	2.01	1.77
Maximum	1.88	1.89	2	2.05	1.92
Range	0.1	0.16	0.75	0.04	0.15
Mean	1.825	1.819	1.738	2.028	1.856
Std. Deviation	0.03258	0.04869	0.2028	0.009852	0.04033
Std. Error of Mean	0.00768	0.01148	0.0478	0.002322	0.009505

## Sheet: Ord. one-way ANOVA RNA A260_280
Number of families	1
Number of comparisons per family	10
Alpha	0.05
Tukey's multiple comparisons test	Mean Diff,	95,00% CI of diff,	Significant?	Summary	Adjusted P Value
MI vs. MII	0.005556	-0,08383 to 0,09494	No	ns	0.9998	A-B
MI vs. MIII	0.08722	-0,002161 to 0,1766	No	ns	0.0593	A-C
MI vs. MIV	-0.2033	-0,2927 to -0,1140	Yes	****	<0,0001	A-D
MI vs. MV	-0.03056	-0,1199 to 0,05883	No	ns	0.8752	A-E
MII vs. MIII	0.08167	-0,007716 to 0,1710	No	ns	0.09	B-C
MII vs. MIV	-0.2089	-0,2983 to -0,1195	Yes	****	<0,0001	B-D
MII vs. MV	-0.03611	-0,1255 to 0,05327	No	ns	0.7924	B-E
MIII vs. MIV	-0.2906	-0,3799 to -0,2012	Yes	****	<0,0001	C-D
MIII vs. MV	-0.1178	-0,2072 to -0,02839	Yes	**	0.0037	C-E
MIV vs. MV	0.1728	0,08339 to 0,2622	Yes	****	<0,0001	D-E
Test details	Mean 1	Mean 2	Mean Diff,	SE of diff,	n1	n2	q	DF
MI vs. MII	1.825	1.819	0.005556	0.03207	18	18	0.245	85
MI vs. MIII	1.825	1.738	0.08722	0.03207	18	18	3.846	85
MI vs. MIV	1.825	2.028	-0.2033	0.03207	18	18	8.967	85
MI vs. MV	1.825	1.856	-0.03056	0.03207	18	18	1.347	85
MII vs. MIII	1.819	1.738	0.08167	0.03207	18	18	3.601	85
MII vs. MIV	1.819	2.028	-0.2089	0.03207	18	18	9.212	85
MII vs. MV	1.819	1.856	-0.03611	0.03207	18	18	1.592	85
MIII vs. MIV	1.738	2.028	-0.2906	0.03207	18	18	12.81	85
MIII vs. MV	1.738	1.856	-0.1178	0.03207	18	18	5.194	85
MIV vs. MV	2.028	1.856	0.1728	0.03207	18	18	7.619	85

## Sheet: Norm. and Lognorm. RNA A260_230
	MI	MII	MIII	MIV	MV
Test for normal distribution
Shapiro-Wilk test
W	0.8951	0.8615	0.6198	0.9704	0.6705
P value	0.0472	0.0129	<0,0001	0.8052	<0,0001
Passed normality test (alpha=0.05)?	No	No	No	Yes	No
P value summary	*	*	****	ns	****
Number of values	18	18	18	18	18

## Sheet: Descriptive stat. RNA A260_230
	MI	MII	MIII	MIV	MV
Number of values	18	18	18	18	18
Minimum	0.03014	0.08	0	0.4	1.5
25% Percentile	0.04799	0.285	0	0.975	1.845
Median	0.1292	0.405	0.1	1.75	2.025
75% Percentile	0.2053	0.625	0.525	2.125	2.25
Maximum	0.414	1.45	2.8	3	5.46
Range	0.3839	1.37	2.8	2.6	3.96
Mean	0.1465	0.4994	0.5889	1.633	2.336
Std. Deviation	0.1111	0.3551	0.9827	0.7146	0.9914
Std. Error of Mean	0.02617	0.08369	0.2316	0.1684	0.2337

## Sheet: Kruskal-Wallis RNA A260_230
Number of families	1
Number of comparisons per family	10
Alpha	0.05
Dunn's multiple comparisons test	Mean rank diff,	Significant?	Summary	Adjusted P Value
MI vs. MII	-19.56	No	ns	0.2469	A-B
MI vs. MIII	-9	No	ns	>0,9999	A-C
MI vs. MIV	-44.56	Yes	****	<0,0001	A-D
MI vs. MV	-53	Yes	****	<0,0001	A-E
MII vs. MIII	10.56	No	ns	>0,9999	B-C
MII vs. MIV	-25	Yes	*	0.0408	B-D
MII vs. MV	-33.44	Yes	**	0.0012	B-E
MIII vs. MIV	-35.56	Yes	***	0.0004	C-D
MIII vs. MV	-44	Yes	****	<0,0001	C-E
MIV vs. MV	-8.444	No	ns	>0,9999	D-E
Test details	Mean rank 1	Mean rank 2	Mean rank diff,	n1	n2
MI vs. MII	20.28	39.83	-19.56	18	18
MI vs. MIII	20.28	29.28	-9	18	18
MI vs. MIV	20.28	64.83	-44.56	18	18
MI vs. MV	20.28	73.28	-53	18	18
MII vs. MIII	39.83	29.28	10.56	18	18
MII vs. MIV	39.83	64.83	-25	18	18
MII vs. MV	39.83	73.28	-33.44	18	18
MIII vs. MIV	29.28	64.83	-35.56	18	18
MIII vs. MV	29.28	73.28	-44	18	18
MIV vs. MV	64.83	73.28	-8.444	18	18

## Sheet: Norm. and Lognorm. RIN
	MI	MII	MIII	MIV	MV
Test for normal distribution
Shapiro-Wilk test
W	0.9339	0.961	0.9494	0.9321	0.9563
P value	0.2528	0.6205	0.7123	0.2356	0.5316
Passed normality test (alpha=0.05)?	Yes	Yes	Yes	Yes	Yes
P value summary	ns	ns	ns	ns	ns
Number of values	17	18	4	17	18

[truncated: 2 more sheets: Descriptive stat. RIN, Ord. one-way ANOVA of RIN]
