# Supplementary material for: A comparison of five methods to maximize RNA and DNA isolation yield from adipose tissue
Source: PeerJ. 2024 May 3;12:e17071. doi: 10.7717/peerj.17071 (PMC11073010; doi:10.7717/peerj.17071)
Supplement: Supplemental Information 4 [file peerj-12-17071-s004.xlsx]

## Sheet: Norm. and Lognorm. DNA yield
	MI	MII	MIII	MIV	MV
Test for normal distribution
Shapiro-Wilk test
W	0.9674	0.9321	0.9628	0.947	0.8721
P value	0.7486	0.2113	0.6574	0.3792	0.0193
Passed normality test (alpha=0.05)?	Yes	Yes	Yes	Yes	No
P value summary	ns	ns	ns	ns	*
Number of values	18	18	18	18	18

## Sheet: Descriptive stat. DNA yield
	MI	MII	MIII	MIV	MV
Number of values	18	18	18	18	18
Minimum	6.301	16.74	214.8	292.3	46.65
25% Percentile	105	38.76	284.6	352.1	56.25
Median	134	73.44	340.7	410.2	67.65
75% Percentile	176.6	112.1	394.7	489	76.76
Maximum	259.2	204.7	539.7	660.2	123.3
Range	252.9	188	324.9	367.9	76.61
Mean	137.6	81.71	347.4	428.3	70.4
Std. Deviation	59.78	52.83	88.27	102.1	20.03
Std. Error of Mean	14.09	12.45	20.81	24.07	4.721

## Sheet: Kruskal-Wallis DNA yield
Number of families	1
Number of comparisons per family	10
Alpha	0.05
Dunn's multiple comparisons test	Mean rank diff,	Significant?	Summary	Adjusted P Value
MI vs. MII	17.33	No	ns	0.4654	A-B
MI vs. MIII	-28.11	Yes	*	0.0125	A-C
MI vs. MIV	-36.94	Yes	***	0.0002	A-D
MI vs. MV	19.39	No	ns	0.2598	A-E
MII vs. MIII	-45.44	Yes	****	<0,0001	B-C
MII vs. MIV	-54.28	Yes	****	<0,0001	B-D
MII vs. MV	2.056	No	ns	>0,9999	B-E
MIII vs. MIV	-8.833	No	ns	>0,9999	C-D
MIII vs. MV	47.5	Yes	****	<0,0001	C-E
MIV vs. MV	56.33	Yes	****	<0,0001	D-E
Test details	Mean rank 1	Mean rank 2	Mean rank diff,	n1	n2
MI vs. MII	39.83	22.5	17.33	18	18
MI vs. MIII	39.83	67.94	-28.11	18	18
MI vs. MIV	39.83	76.78	-36.94	18	18
MI vs. MV	39.83	20.44	19.39	18	18
MII vs. MIII	22.5	67.94	-45.44	18	18
MII vs. MIV	22.5	76.78	-54.28	18	18
MII vs. MV	22.5	20.44	2.056	18	18
MIII vs. MIV	67.94	76.78	-8.833	18	18
MIII vs. MV	67.94	20.44	47.5	18	18
MIV vs. MV	76.78	20.44	56.33	18	18

## Sheet: Norm. and Lognorm. DNA A260_280
	MI	MII	MIII	MIV	MV
Test for normal distribution
Shapiro-Wilk test
W	0.8306	0.9561	0.8867	0.9193	0.9088
P value	0.0043	0.5291	0.0338	0.1258	0.0818
Passed normality test (alpha=0.05)?	No	Yes	No	Yes	Yes
P value summary	**	ns	*	ns	ns
Number of values	18	18	18	18	18

## Sheet: Descriptive stat. DNA A260_280
	MI	MII	MIII	MIV	MV
Number of values	18	18	18	18	18
Minimum	0.79	1.15	1.75	1.7	1.47
25% Percentile	1.335	1.348	1.798	1.73	1.49
Median	1.45	1.39	1.83	1.75	1.54
75% Percentile	1.545	1.503	1.833	1.803	1.593
Maximum	1.67	1.63	1.94	1.86	1.61
Range	0.88	0.48	0.19	0.16	0.14
Mean	1.396	1.415	1.823	1.761	1.539
Std. Deviation	0.221	0.1157	0.04156	0.04562	0.04945
Std. Error of Mean	0.05209	0.02726	0.009795	0.01075	0.01166

## Sheet: Kruskal-Wallis DNA A260_280
Number of families	1
Number of comparisons per family	10
Alpha	0.05
Dunn's multiple comparisons test	Mean rank diff,	Significant?	Summary	Adjusted P Value
MI vs. MII	2.944	No	ns	>0,9999	A-B
MI vs. MIII	-55.08	Yes	****	<0,0001	A-C
MI vs. MIV	-42.42	Yes	****	<0,0001	A-D
MI vs. MV	-14.19	No	ns	>0,9999	A-E
MII vs. MIII	-58.03	Yes	****	<0,0001	B-C
MII vs. MIV	-45.36	Yes	****	<0,0001	B-D
MII vs. MV	-17.14	No	ns	0.4891	B-E
MIII vs. MIV	12.67	No	ns	>0,9999	C-D
MIII vs. MV	40.89	Yes	****	<0,0001	C-E
MIV vs. MV	28.22	Yes	*	0.0118	D-E
Test details	Mean rank 1	Mean rank 2	Mean rank diff,	n1	n2
MI vs. MII	23.75	20.81	2.944	18	18
MI vs. MIII	23.75	78.83	-55.08	18	18
MI vs. MIV	23.75	66.17	-42.42	18	18
MI vs. MV	23.75	37.94	-14.19	18	18
MII vs. MIII	20.81	78.83	-58.03	18	18
MII vs. MIV	20.81	66.17	-45.36	18	18
MII vs. MV	20.81	37.94	-17.14	18	18
MIII vs. MIV	78.83	66.17	12.67	18	18
MIII vs. MV	78.83	37.94	40.89	18	18
MIV vs. MV	66.17	37.94	28.22	18	18

## Sheet: Norm. and Lognorm. DNA A260_230
	MI	MII	MIII	MIV	MV
Test for normal distribution
Shapiro-Wilk test
W	0.8816	0.8585	0.8338	0.9218	0.5781
P value	0.0278	0.0116	0.0047	0.139	<0,0001
Passed normality test (alpha=0.05)?	No	No	No	Yes	No
P value summary	*	*	**	ns	****
Number of values	18	18	18	18	18

## Sheet: Descriptive stat. DNA A260_230
	MI	MII	MIII	MIV	MV
Number of values	18	18	18	18	18
Minimum	0.201	0.14	1.855	0.3	0
25% Percentile	0.2201	0.17	3	2	0.035
Median	0.2859	0.2	3.2	2.2	0.085
75% Percentile	0.4055	0.2875	4.225	3.35	0.115
Maximum	0.5671	0.39	7.1	4.2	0.71
Range	0.3661	0.25	5.245	3.9	0.71
Mean	0.3215	0.2261	3.786	2.472	0.115
Std. Deviation	0.1132	0.07663	1.409	0.8989	0.1584
Std. Error of Mean	0.02667	0.01806	0.3321	0.2119	0.03734

## Sheet: Kruskal-Wallis DNA A260_230
Number of families	1
Number of comparisons per family	10
Alpha	0.05
Dunn's multiple comparisons test	Mean rank diff,	Significant?	Summary	Adjusted P Value
MI vs. MII	11.58	No	ns	>0,9999	A-B
MI vs. MIII	-36.67	Yes	***	0.0003	A-C
MI vs. MIV	-25.33	Yes	*	0.0362	A-D
MI vs. MV	28.75	Yes	**	0.0096	A-E
MII vs. MIII	-48.25	Yes	****	<0,0001	B-C
MII vs. MIV	-36.92	Yes	***	0.0002	B-D
MII vs. MV	17.17	No	ns	0.4865	B-E
MIII vs. MIV	11.33	No	ns	>0,9999	C-D
MIII vs. MV	65.42	Yes	****	<0,0001	C-E
MIV vs. MV	54.08	Yes	****	<0,0001	D-E
Test details	Mean rank 1	Mean rank 2	Mean rank diff,	n1	n2
MI vs. MII	41.17	29.58	11.58	18	18
MI vs. MIII	41.17	77.83	-36.67	18	18
MI vs. MIV	41.17	66.5	-25.33	18	18
MI vs. MV	41.17	12.42	28.75	18	18
MII vs. MIII	29.58	77.83	-48.25	18	18
MII vs. MIV	29.58	66.5	-36.92	18	18
MII vs. MV	29.58	12.42	17.17	18	18
MIII vs. MIV	77.83	66.5	11.33	18	18
MIII vs. MV	77.83	12.42	65.42	18	18
MIV vs. MV	66.5	12.42	54.08	18	18

## Sheet: Norm. and Lognorm. DIN
	MI	MII	MIII	MIV
Test for normal distribution
Shapiro-Wilk test
W	0.8576	0.9293	0.8799	0.8824
P value	0.181	0.5751	0.2686	0.28
Passed normality test (alpha=0.05)?	Yes	Yes	Yes	Yes
P value summary	ns	ns	ns	ns
Number of values	6	6	6	6

[truncated: 2 more sheets: Descriptive stat. DIN, Ord. one-way ANOVA of DIN]
